# Supplementary material for: Manganese-catalysed divergent silylation of alkenes
Source: Springer Nature journal article supplement (doi:10.1038/s41557-020-00589-8), 2020-12-14
Supplement: 41557_2020_589_MOESM129_ESM.mol [file 41557_2020_589_MOESM129_ESM.mol]

nchem.19071461E-comp3v.mol
  ChemDraw10162013082D

 13 12  0  0  0  0  0  0  0  0999 V2000
   -0.7107   -0.4125    0.0000 C   0  0  0  0  0  0  0  0  0  0  0  0
    0.0037    0.0000    0.0000 C   0  0  0  0  0  0  0  0  0  0  0  0
    0.7182   -0.4125    0.0000 C   0  0  0  0  0  0  0  0  0  0  0  0
   -1.4277    0.0014    0.0000 C   0  0  0  0  0  0  0  0  0  0  0  0
   -2.1447   -0.4125    0.0000 C   0  0  0  0  0  0  0  0  0  0  0  0
   -2.8616    0.0014    0.0000 C   0  0  0  0  0  0  0  0  0  0  0  0
    1.4327    0.0000    0.0000 Si  0  0  0  0  0  0  0  0  0  0  0  0
    2.1471   -1.2375    0.0000 C   0  0  0  0  0  0  0  0  0  0  0  0
    1.4327   -0.8250    0.0000 C   0  0  0  0  0  0  0  0  0  0  0  0
    0.7182    1.2375    0.0000 C   0  0  0  0  0  0  0  0  0  0  0  0
    0.7182    0.4125    0.0000 C   0  0  0  0  0  0  0  0  0  0  0  0
    2.8616    0.0000    0.0000 C   0  0  0  0  0  0  0  0  0  0  0  0
    2.1471    0.4125    0.0000 C   0  0  0  0  0  0  0  0  0  0  0  0
  3  7  1  0      
  7  9  1  0      
  7 11  1  0      
  7 13  1  0      
  8  9  1  0      
 10 11  1  0      
 12 13  1  0      
  1  2  1  0      
  2  3  2  0      
  1  4  1  0      
  4  5  1  0      
  5  6  1  0      
M  STY  1   1 SUP
M  SLB  1   1   1
M  SAL   1  7   7   8   9  10  11  12  13
M  SBL   1  1   1
M  SMT   1 SiEt3
M  SBV   1   1   -0.7145   -0.4125
M  END
